# Supplementary material for: Modeling vegetation and carbon dynamics of managed grasslands atthe global scale with LPJmL 3.6
Source: Copernicus journal article supplement (doi:10.5194/gmd-2017-26), 2017-02-21

hbest

(c)

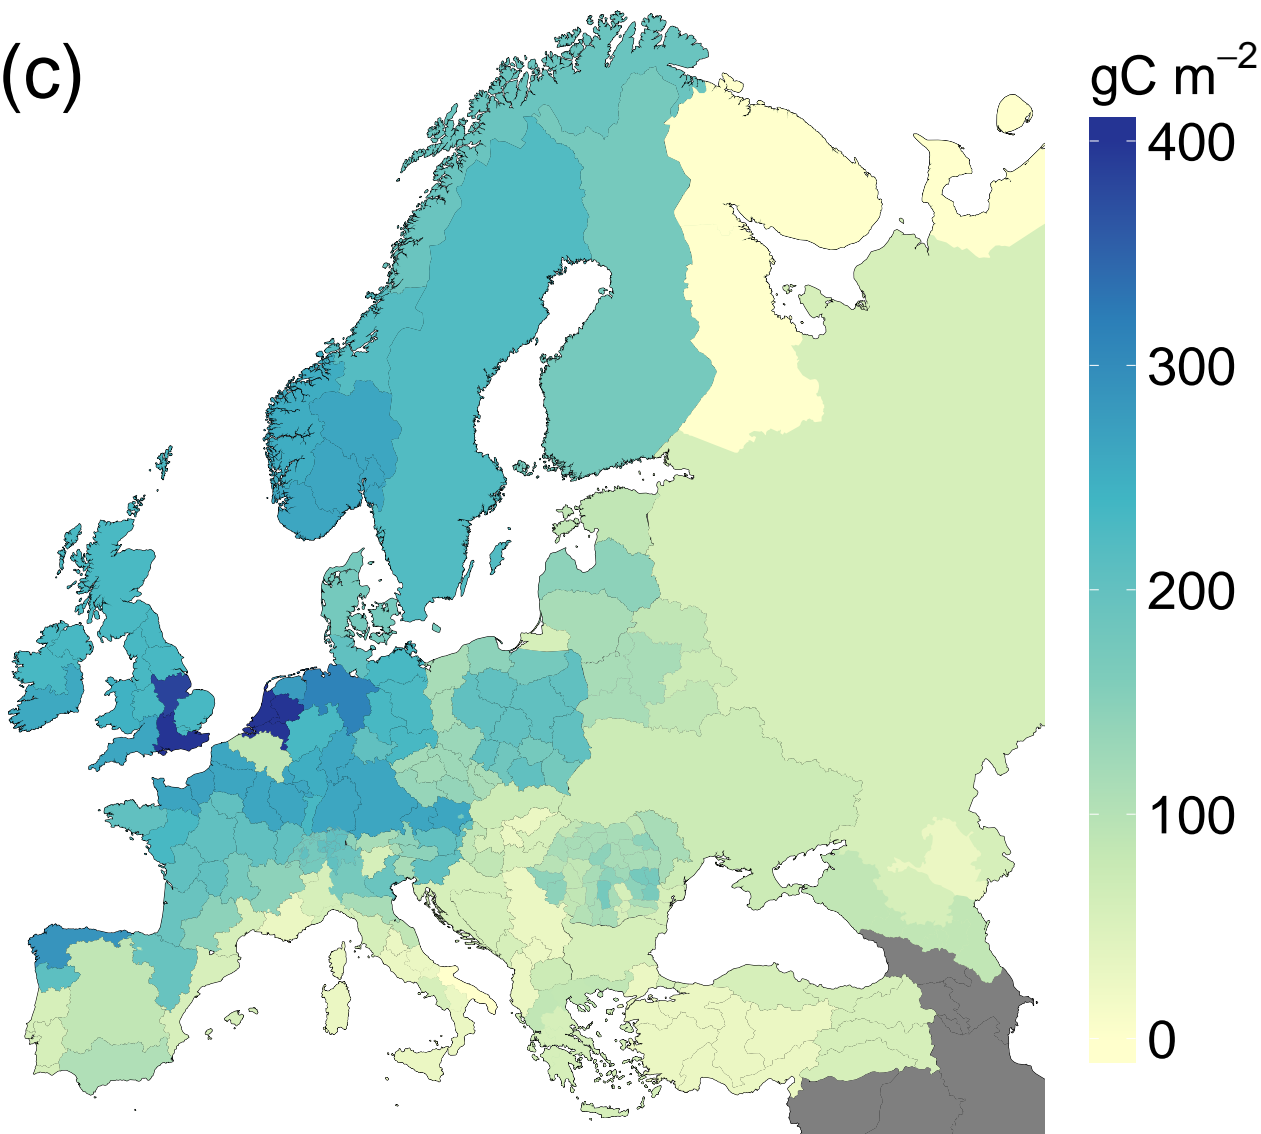

Supplement: Supplementary file [file figure_2.pdf › figure_2.pdf]
